# Supplementary material for: Enhancing mesenchymal stem cell response using uniaxially stretched poly(ε-caprolactone) film micropatterns for vascular tissue engineering application
Source: Royal Society of Chemistry journal article supplement (doi:10.1039/c4tb00522h), 2014-07-11
Supplement: c4tb00522h1.pdf [file c4tb00522h1.pdf]

**Table S1** Stem cell immunophenotype of isolated MSCs\*. (Passage 6)

| Stem-Cell-Specific Monoclonal Antibodies | IgG Isotypes | Positive Cell Number |                        |
|------------------------------------------|--------------|----------------------|------------------------|
|                                          |              | Neg Ctrl (%)         | Experimental group (%) |
| CD73 IgG1-APC                            | IgG1-APC     | 0.05                 | 99.95                  |
| CD45 IgG1-FITC                           | IgG1-FITC    | 0.33                 | 0.36                   |
| CD90 IgG1-FITC                           |              |                      | 99.76                  |
| CD19 IgG1-RPE                            | IgG1-RPE     | 0.05                 | 0.03                   |
| CD34 IgG1-RPE                            |              |                      | 1.22                   |
| CD105 IgG1-RPE                           |              |                      | 99.48                  |

\* FACS analysis of immunocytochemistry-labeled cells following the descriptions in "Materials and methods" on the "intracellular qualitative analysis" just without permeabilization. IgG isotypes were used as negative control (Neg Ctrl) groups.

**Table S2** Compiled list of gene targets probed for SMCs contractile markers.

| GenBank Accession number | Gene target | Sequence (5'-3')                                | Amplicon length (bp) |
|--------------------------|-------------|-------------------------------------------------|----------------------|
| NM_001256799             | GAPDH       | ACAGTTGCCATGTAGACC<br>TTTTTGTTGAGCACAGG         | 95                   |
| NM_001613                | ACTA2       | AGATCAAGATCATTGCCCC<br>TTCATCGTATTCCTGTTTGC     | 116                  |
| NM_001299                | CNN1        | CATCATTCTTTGCGAATTCATC<br>CAATTTTGGGTTGACTCATTG | 75                   |
| NM_022844                | MYH11       | CTATCTGCTAGAAAAATCACGG<br>CACTTCTCATCTTCTCCTTG  | 104                  |

**Table S3** Compiled list of monoclonal antibodies targeted for SMCs contractile markers.

| 1 <sup>st</sup> monoclonal antibodies<br>(Mouse anti-human SM) | IgG isotypes | Dilution in 1-wt% BSA solution (v/v) |
|----------------------------------------------------------------|--------------|--------------------------------------|
| SM- $\alpha$ -actin                                            | IgG 2a k     | 1:100                                |
| Calponin                                                       | IgG 1 k      | 1:100                                |
| SM myosin heavy chain (SM-MHC)                                 | IgG 1 k      | 1:50                                 |
| 2 <sup>nd</sup> antibody<br>(Goat anti-mouse IgG-FITC)         | /            | 1:500                                |

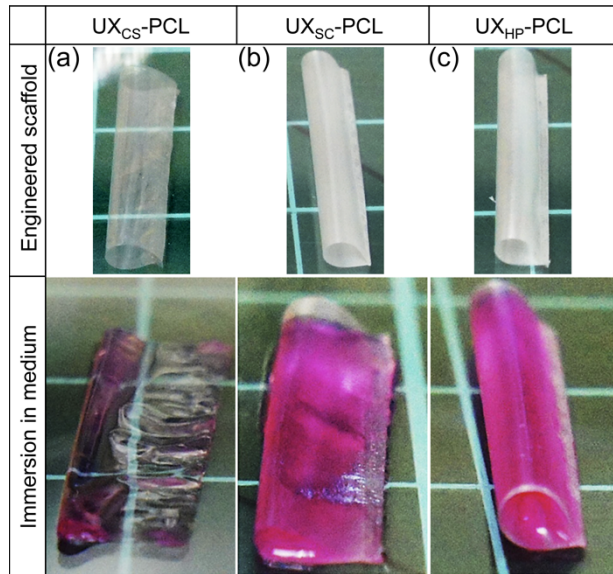

**Fig. S1** Collapse of 3D tubular vascular TE scaffolds. Scaffolds were engineered from (a) UX<sub>CS</sub>-PCL, (b) UX<sub>SC</sub>-PCL, and (c) UX<sub>HP</sub>-PCL, respectively. UX<sub>HP</sub>-PCL-based scaffold after being in contact with the biological liquids (e.g. cell culture medium) retained tubular patency without collapse.
